# Supplementary material
Source: HighWire-hosted journal article supplement (https://www.cmaj.ca/highwire/filestream/58340/field_highwire_adjunct_files/0/image-tanosteo-1-at.pdf)

**Appendix 1:** Radiographs of a patient's hands (left panel) and right shoulder (right panel). Small, round, sclerotic opacities near the joint space are visible in both images.

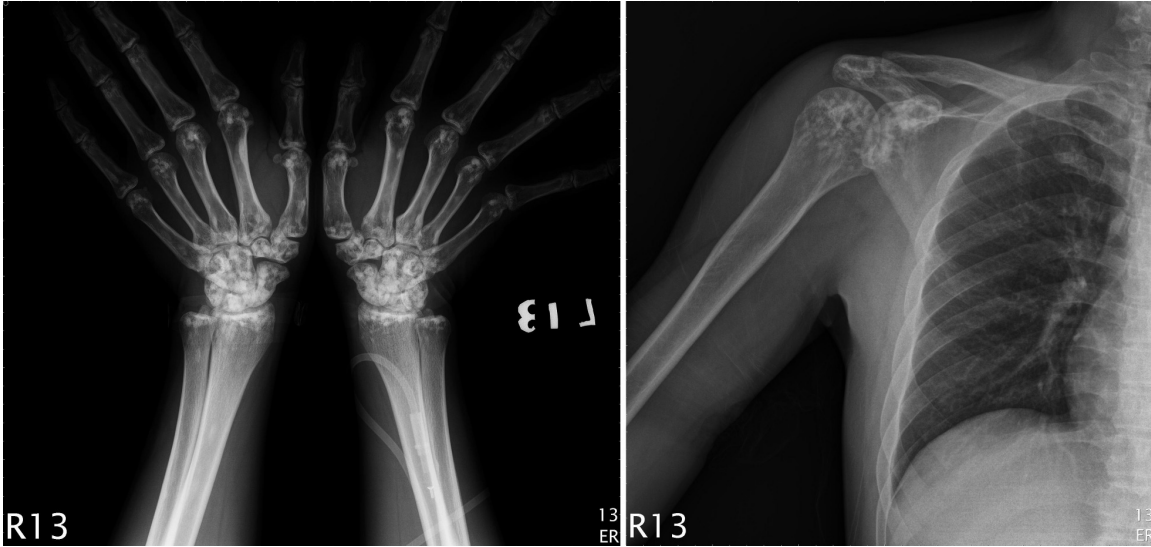

Supplement: image-tanosteo-1-at.pdf [file image-tanosteo-1-at.pdf]
